# Supplementary material
Source: MDPI journal article supplement (https://www.mdpi.com/2073-4395/12/2/281)
Supplement: s1 [file s1]

**Figure S1:** Annual average of Cover and management (*C*) factor of Apulia region under Conventional Management for annual cropland.

**Figure S2:** Annual average of Cover and management (*C*) factor of Apulia region under Conservation Agriculture for annual cropland.

**Figure S3:** Annual average of soil loss using RUSLE model for Apulia region under (a) Conventional Management for annual cropland.

**Figure S4:** Annual average of soil loss using RUSLE model for Apulia region under Conservation Agriculture for annual cropland.
