# Supplementary material
Source: MDPI journal article supplement (https://www.mdpi.com/2073-4395/12/2/281)
Supplement: s1 [file s1]

**Table S3.** Nine new classes obtained by combined altitude class with three quantiles.

| <b>Numerical class</b> | <b>Altitude class</b>   |
|------------------------|-------------------------|
| 101                    | Plain + low slope       |
| 102                    | Plain + medium slope    |
| 103                    | Plain + high slope      |
| 201                    | Hill + low slope        |
| 202                    | Hill + medium slope     |
| 203                    | Hill + high slope       |
| 301                    | Mountain + low slope    |
| 302                    | Mountain + medium slope |
| 303                    | Mountain + high slope   |
