# Supplementary material
Source: MDPI journal article supplement (https://www.mdpi.com/2073-4395/12/2/281)
Supplement: s1 [file s1]

**Table S2.** Calculation of annual cropland areas in Apulia region in four different years.

| <b>Annual production cycles</b> | <b>Annual cropland<br/>(LUCAS dataset)</b> | <b>Hectares (ha)</b> |
|---------------------------------|--------------------------------------------|----------------------|
| 2016 – 2017                     | 2015                                       | 732,052              |
| 2017 – 2018                     | 2018                                       | 772,654              |
| 2018 – 2019                     | 2018                                       | 772,654              |
| 2019 – 2020                     | 2018                                       | 772,654              |
