# Supplementary material
Source: MDPI journal article supplement (https://www.mdpi.com/2073-4395/12/2/281)
Supplement: s1 [file s1]

Table S4. Intermediate RUSLE values in the Apulia region for each management system.

| RUSLE                |                    |                    |      |
|----------------------|--------------------|--------------------|------|
|                      | CM                 | CA                 |      |
| Agricultural seasons | t ha <sup>-1</sup> | t ha <sup>-1</sup> | Δ%   |
| 2016-2017            | 2.69               | 2.49               | -7.4 |
| 2017-2018            | 2.13               | 1.97               | -7.5 |
| 2018-2019            | 2.29               | 2.12               | -7.4 |
| 2019-2020            | 2.02               | 1.88               | -6.9 |

CM = Conventional Management. CA = Conservation Agriculture. RUSLE = Revised universal soil loss equation. Δ% = Percentage difference.
