# Supplementary material
Source: MDPI journal article supplement (https://www.mdpi.com/2073-4395/12/2/281)
Supplement: s1 [file s1]

**Table S1.** Descriptive statistical values of the *R* factor (MJ mm h<sup>-1</sup> ha<sup>-1</sup> yr<sup>-1</sup>) for each year-periods of RUSLE calculation.

| <b>N-year period</b> | <b>Maximum <i>R</i>-factor</b> | <b>Mean <i>R</i>-factor</b> | <b>Minimum <i>R</i>-factor</b> | <b>Standard deviation <i>R</i>-factor</b> | <b><i>R</i>-factor masked for ACL</b> |
|----------------------|--------------------------------|-----------------------------|--------------------------------|-------------------------------------------|---------------------------------------|
| 1981 – 2016          | 501.7                          | 315.1                       | 200.0                          | 60.1                                      | 280.4♦                                |
| 1981 – 2017          | 498.2                          | 315.2                       | 198.8                          | 58.7                                      | 282.1•                                |
| 1981 – 2018          | 494.0                          | 316.6                       | 201.8                          | 57.2                                      | 283.6•                                |
| 1981 – 2019          | 504.2                          | 318.3                       | 205.0                          | 57.4                                      | 284.4•                                |

♦ = Annual Cropland of Apulia Region 2015. • = Annual Cropland of Apulia Region 2018.
