# Supplementary material
Source: MDPI journal article supplement (https://www.mdpi.com/2073-4395/12/2/281)
Supplement: s1 [file s1]

Archive with 9 entries (9 files):
- Caption Supplementary Figures.pdf
- Figure S1.bmp
- Figure S2.bmp
- Figure S3.bmp
- Figure S4.bmp
- Table S1.pdf
- Table S2.pdf
- Table S3.pdf
- Table S4.pdf
