# Supplementary material
Source: MDPI journal article supplement (https://www.mdpi.com/2073-4395/12/2/281)

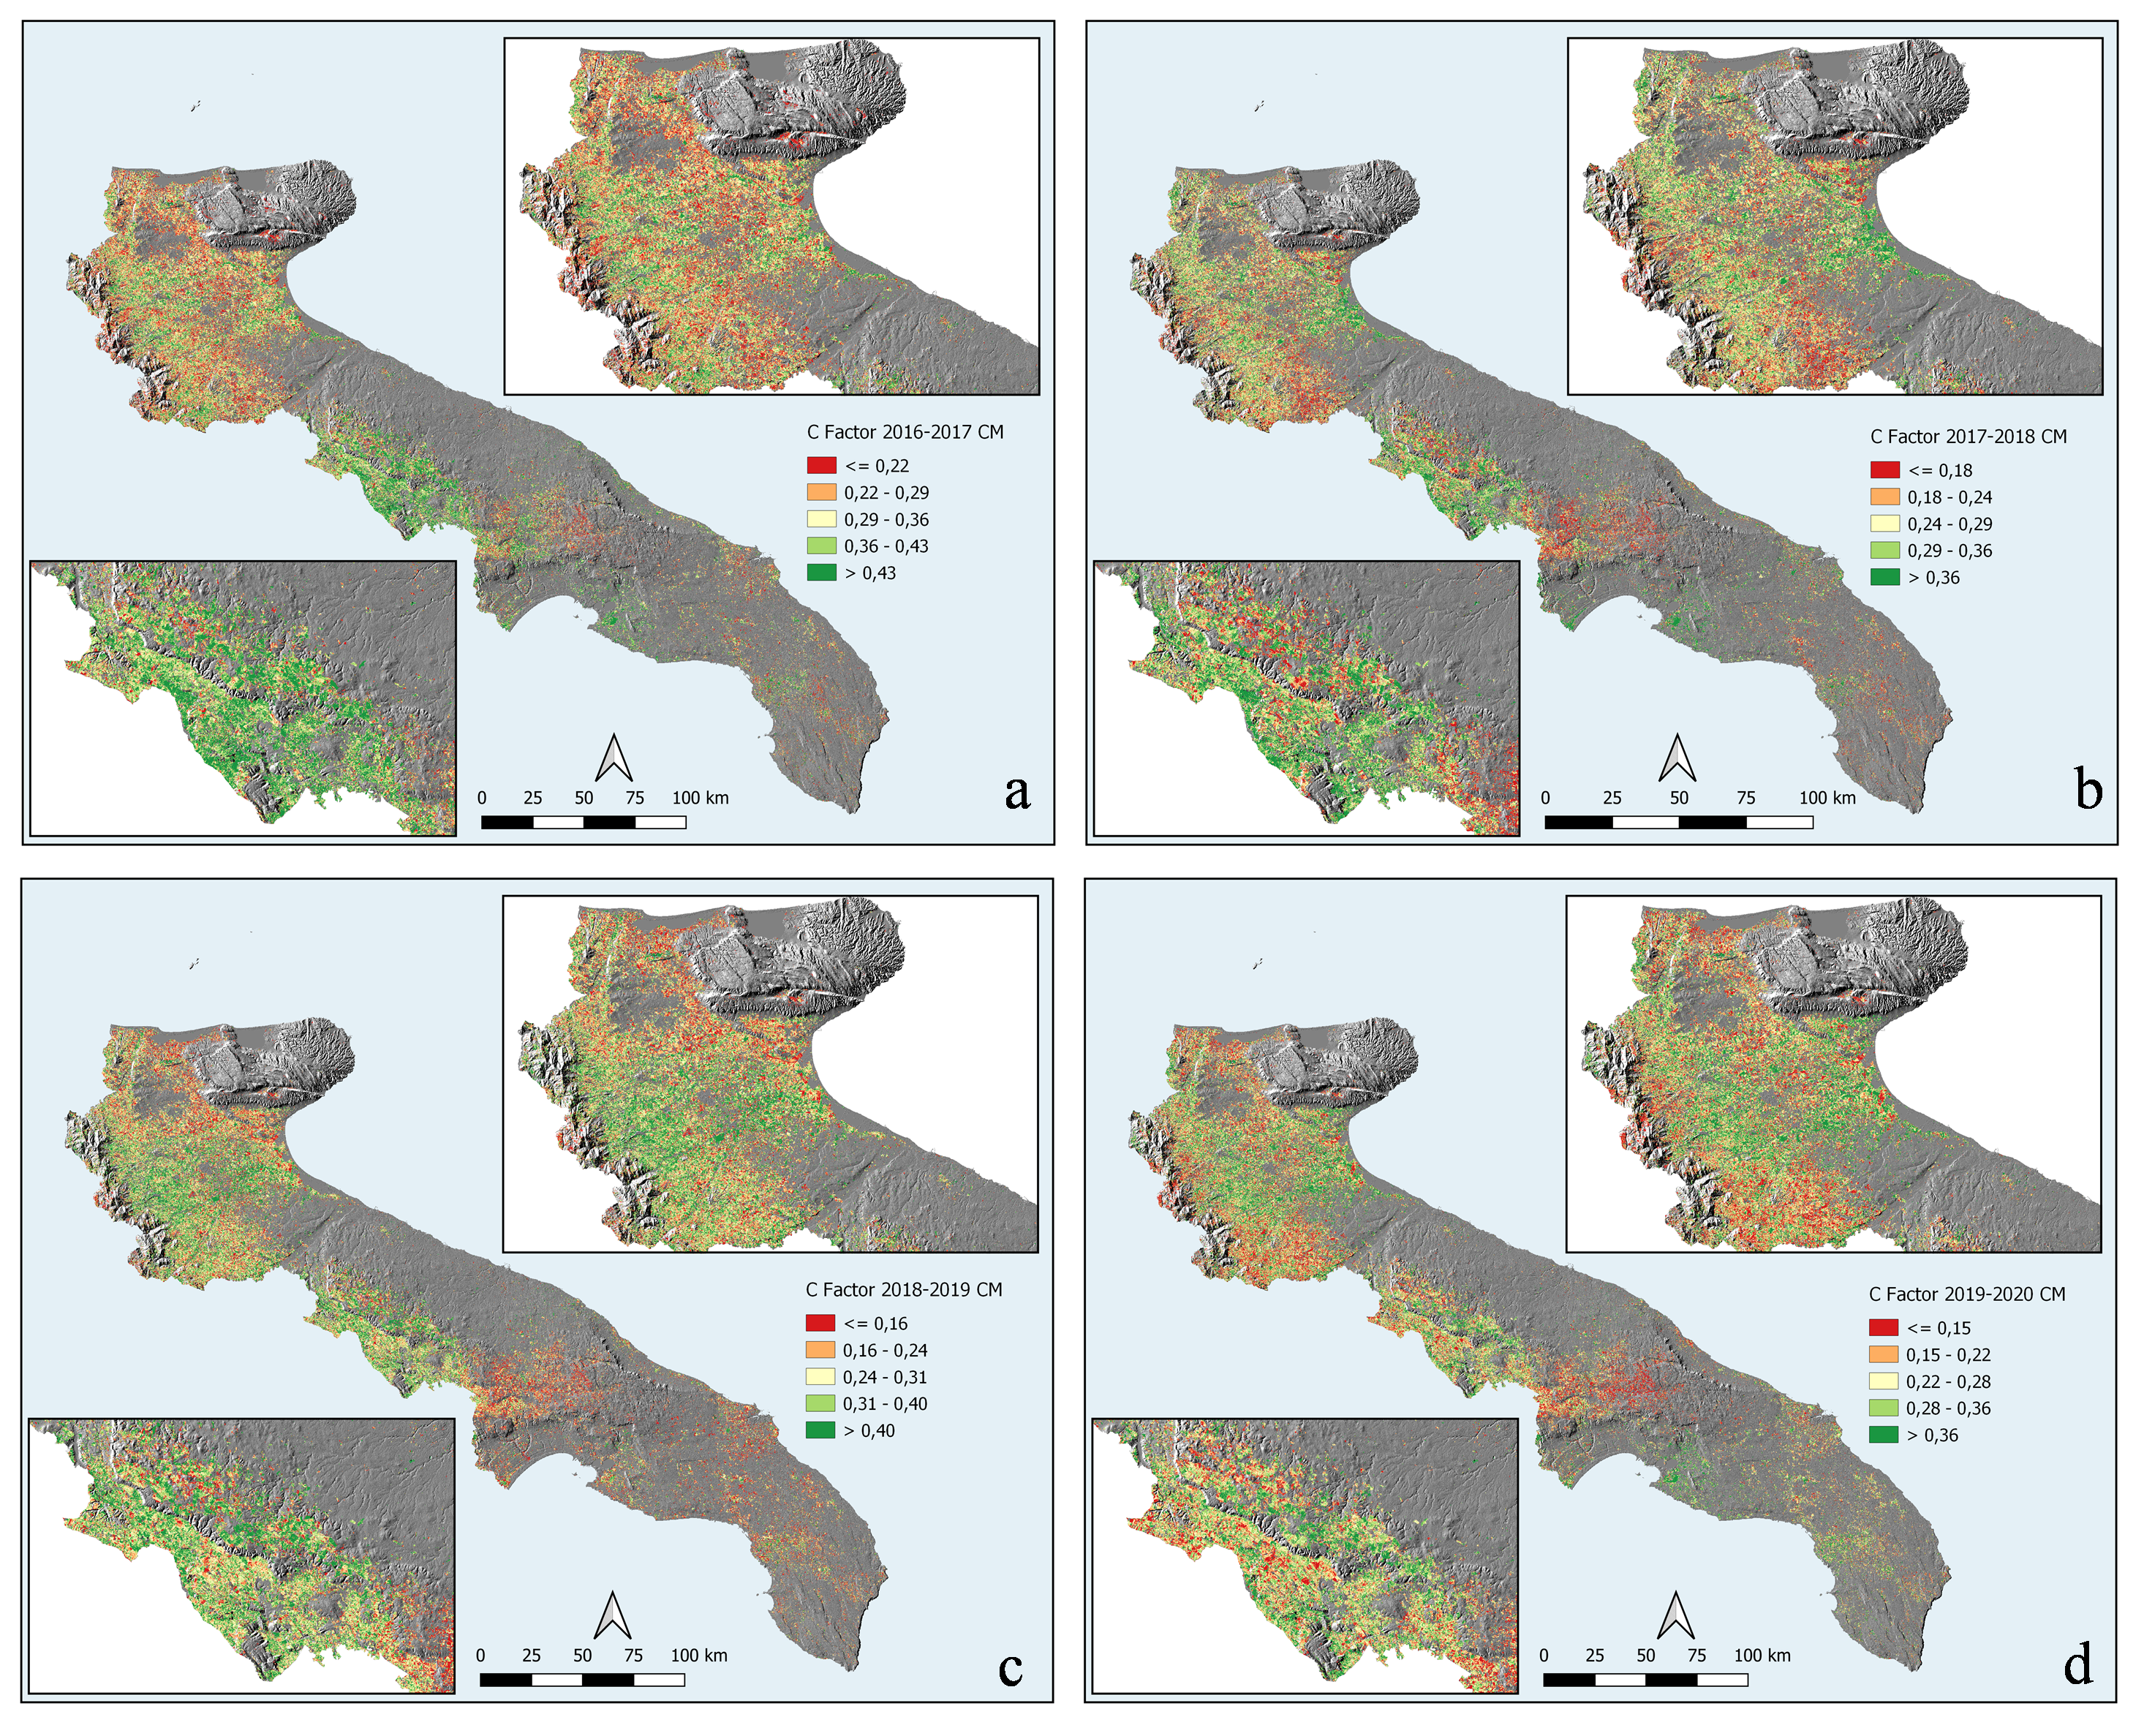

Supplement: s1 [file s1 › Figure S1.bmp]

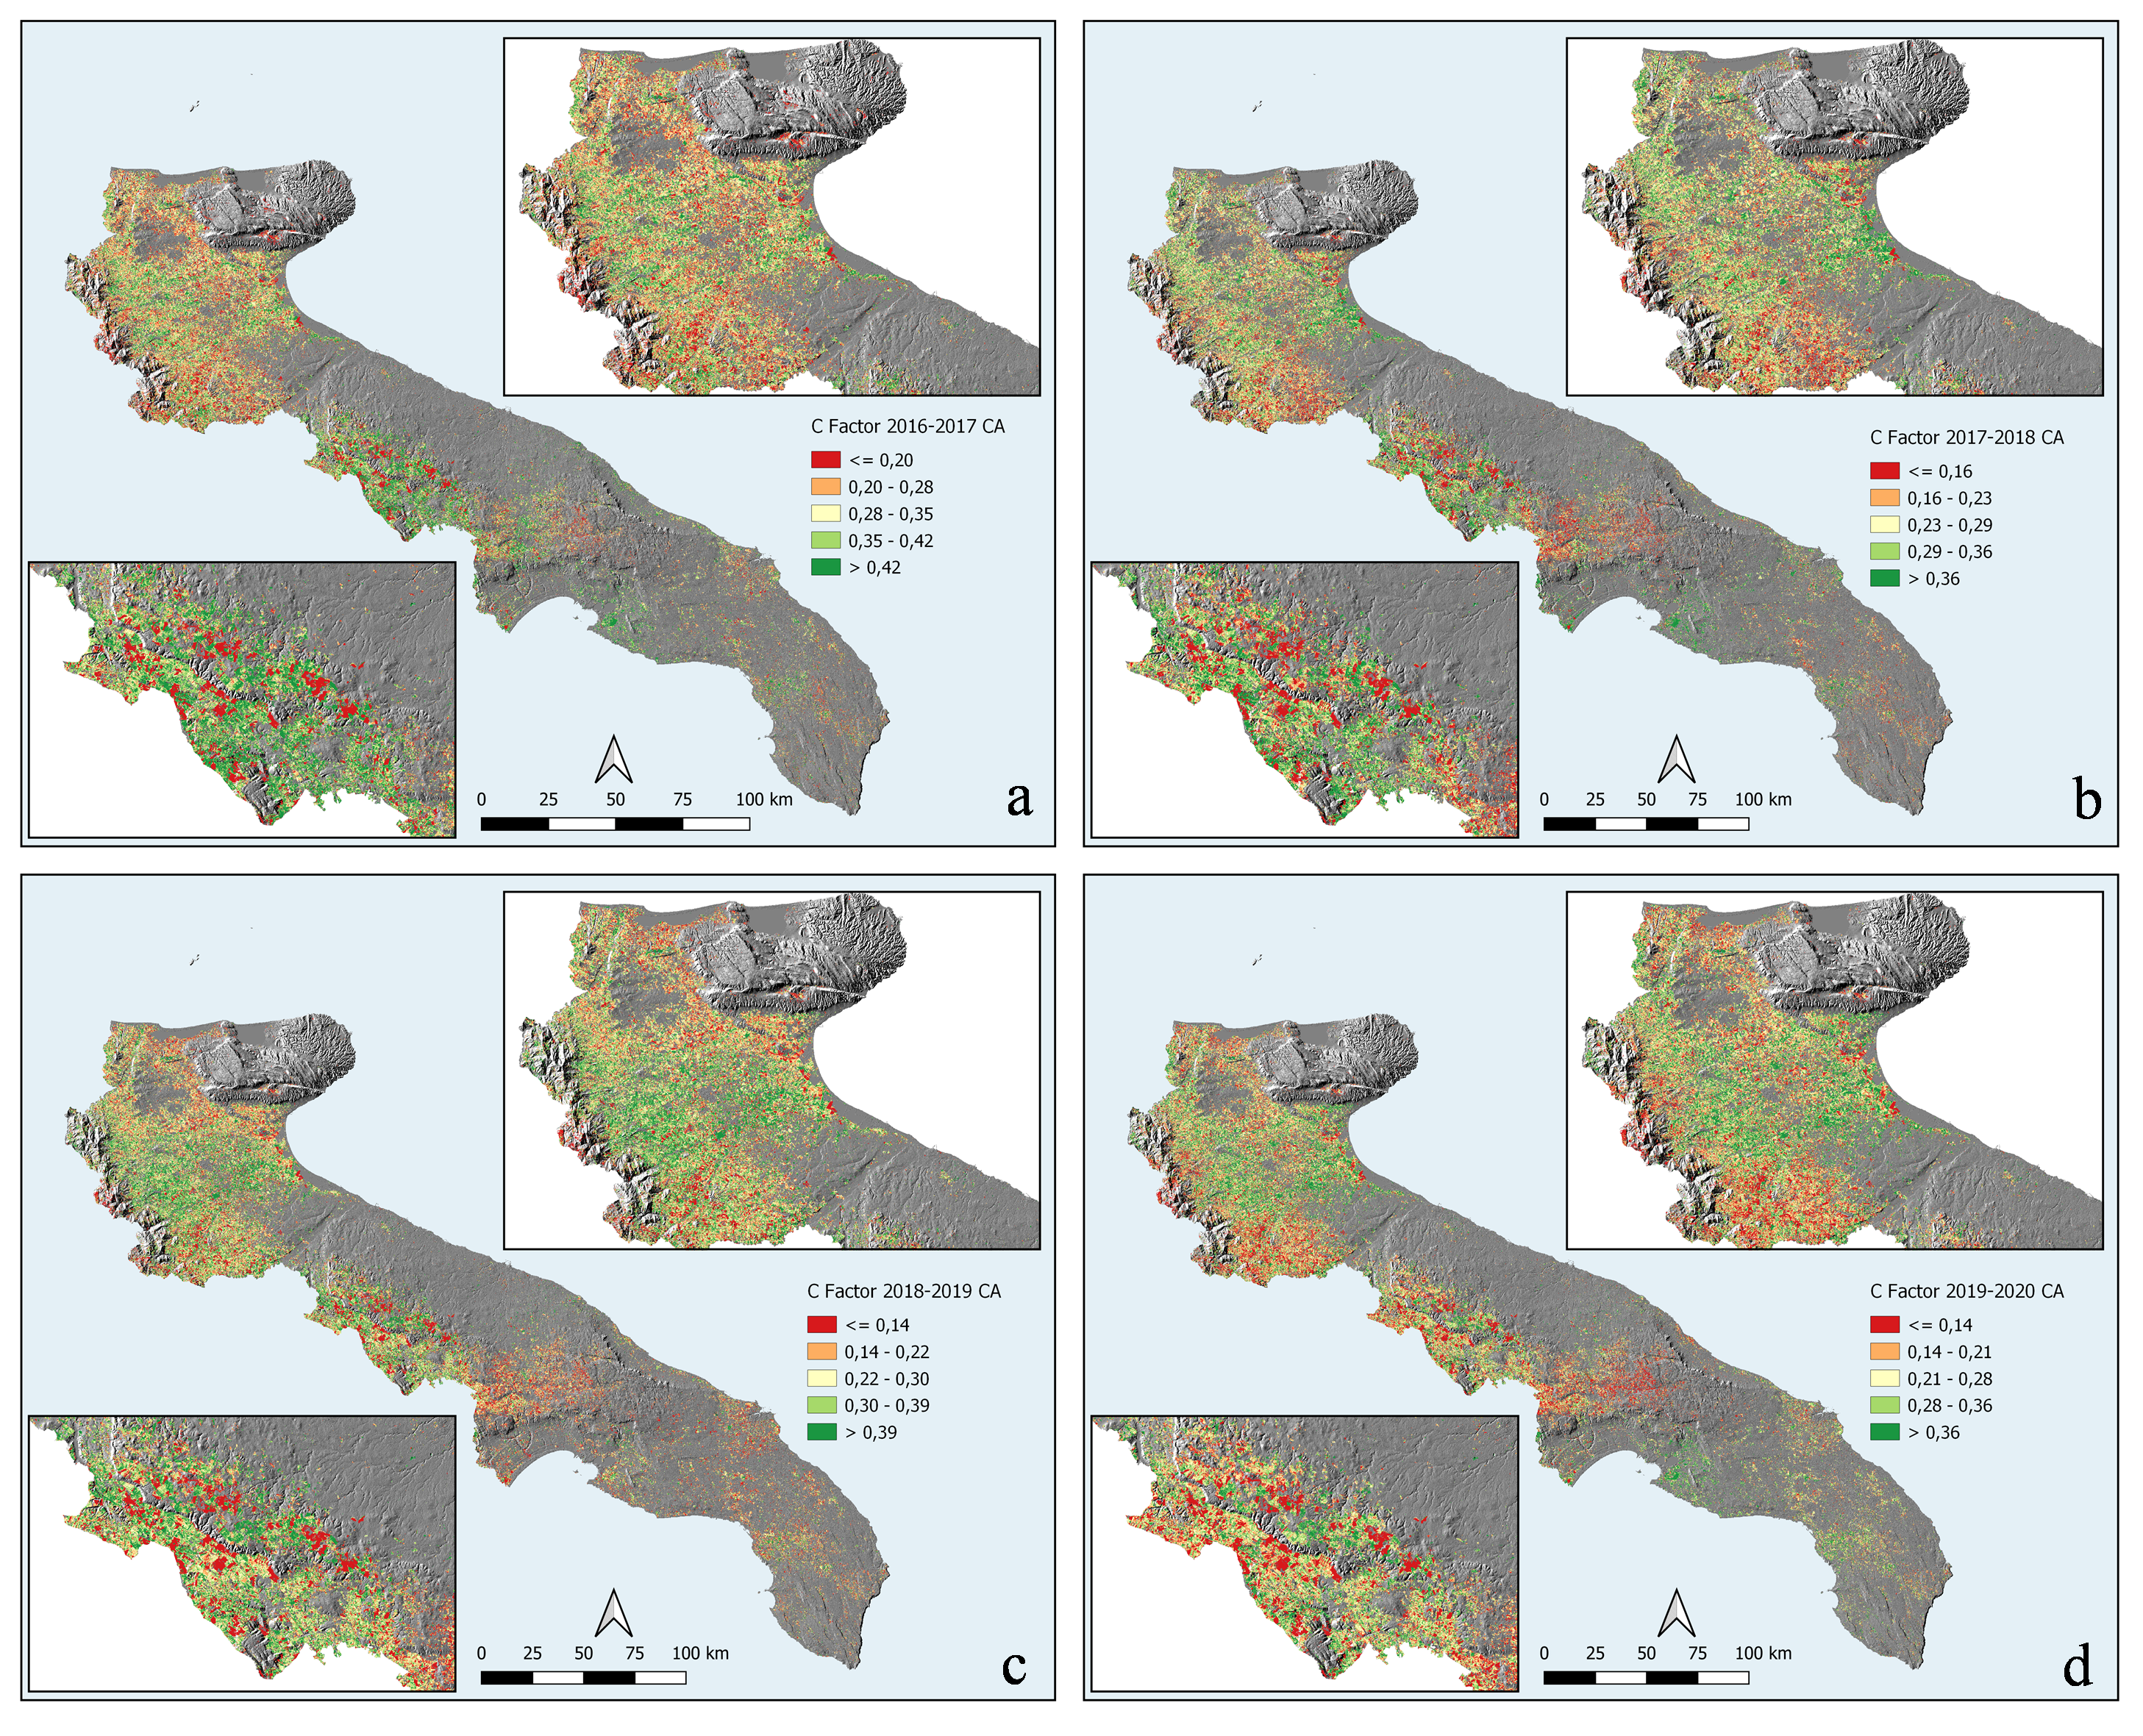

Supplement: s1 [file s1 › Figure S2.bmp]

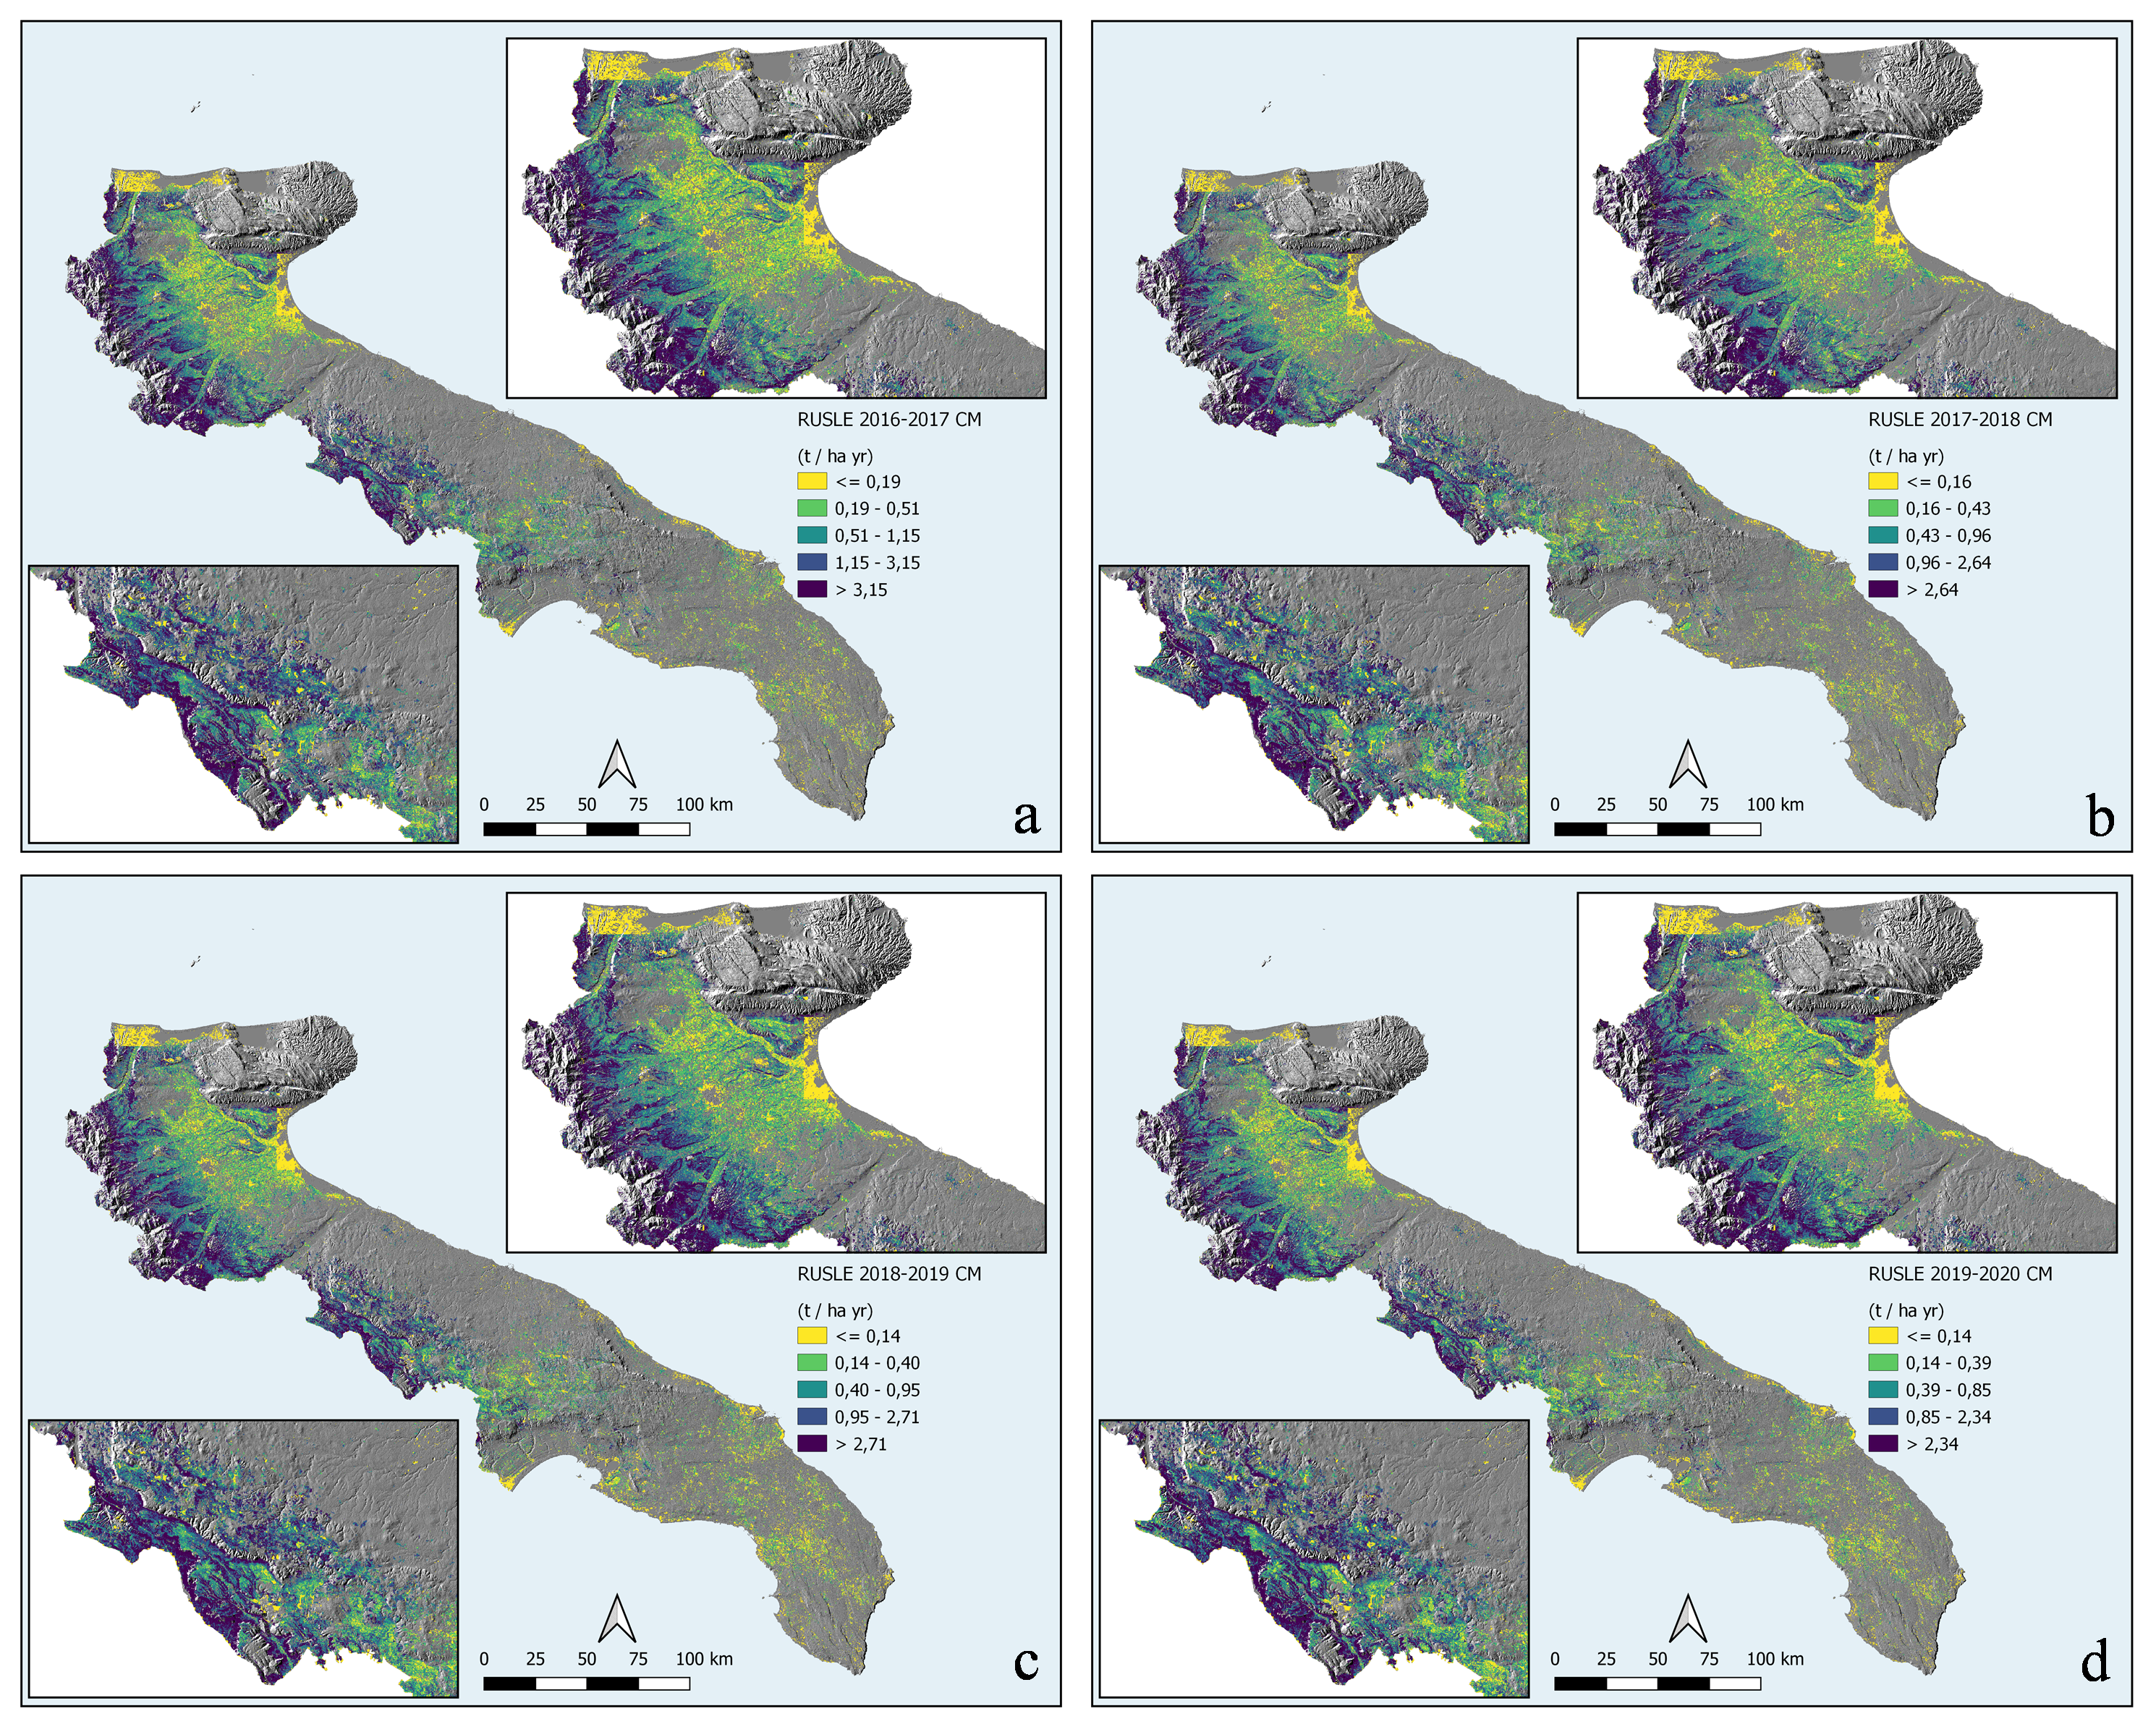

Supplement: s1 [file s1 › Figure S3.bmp]

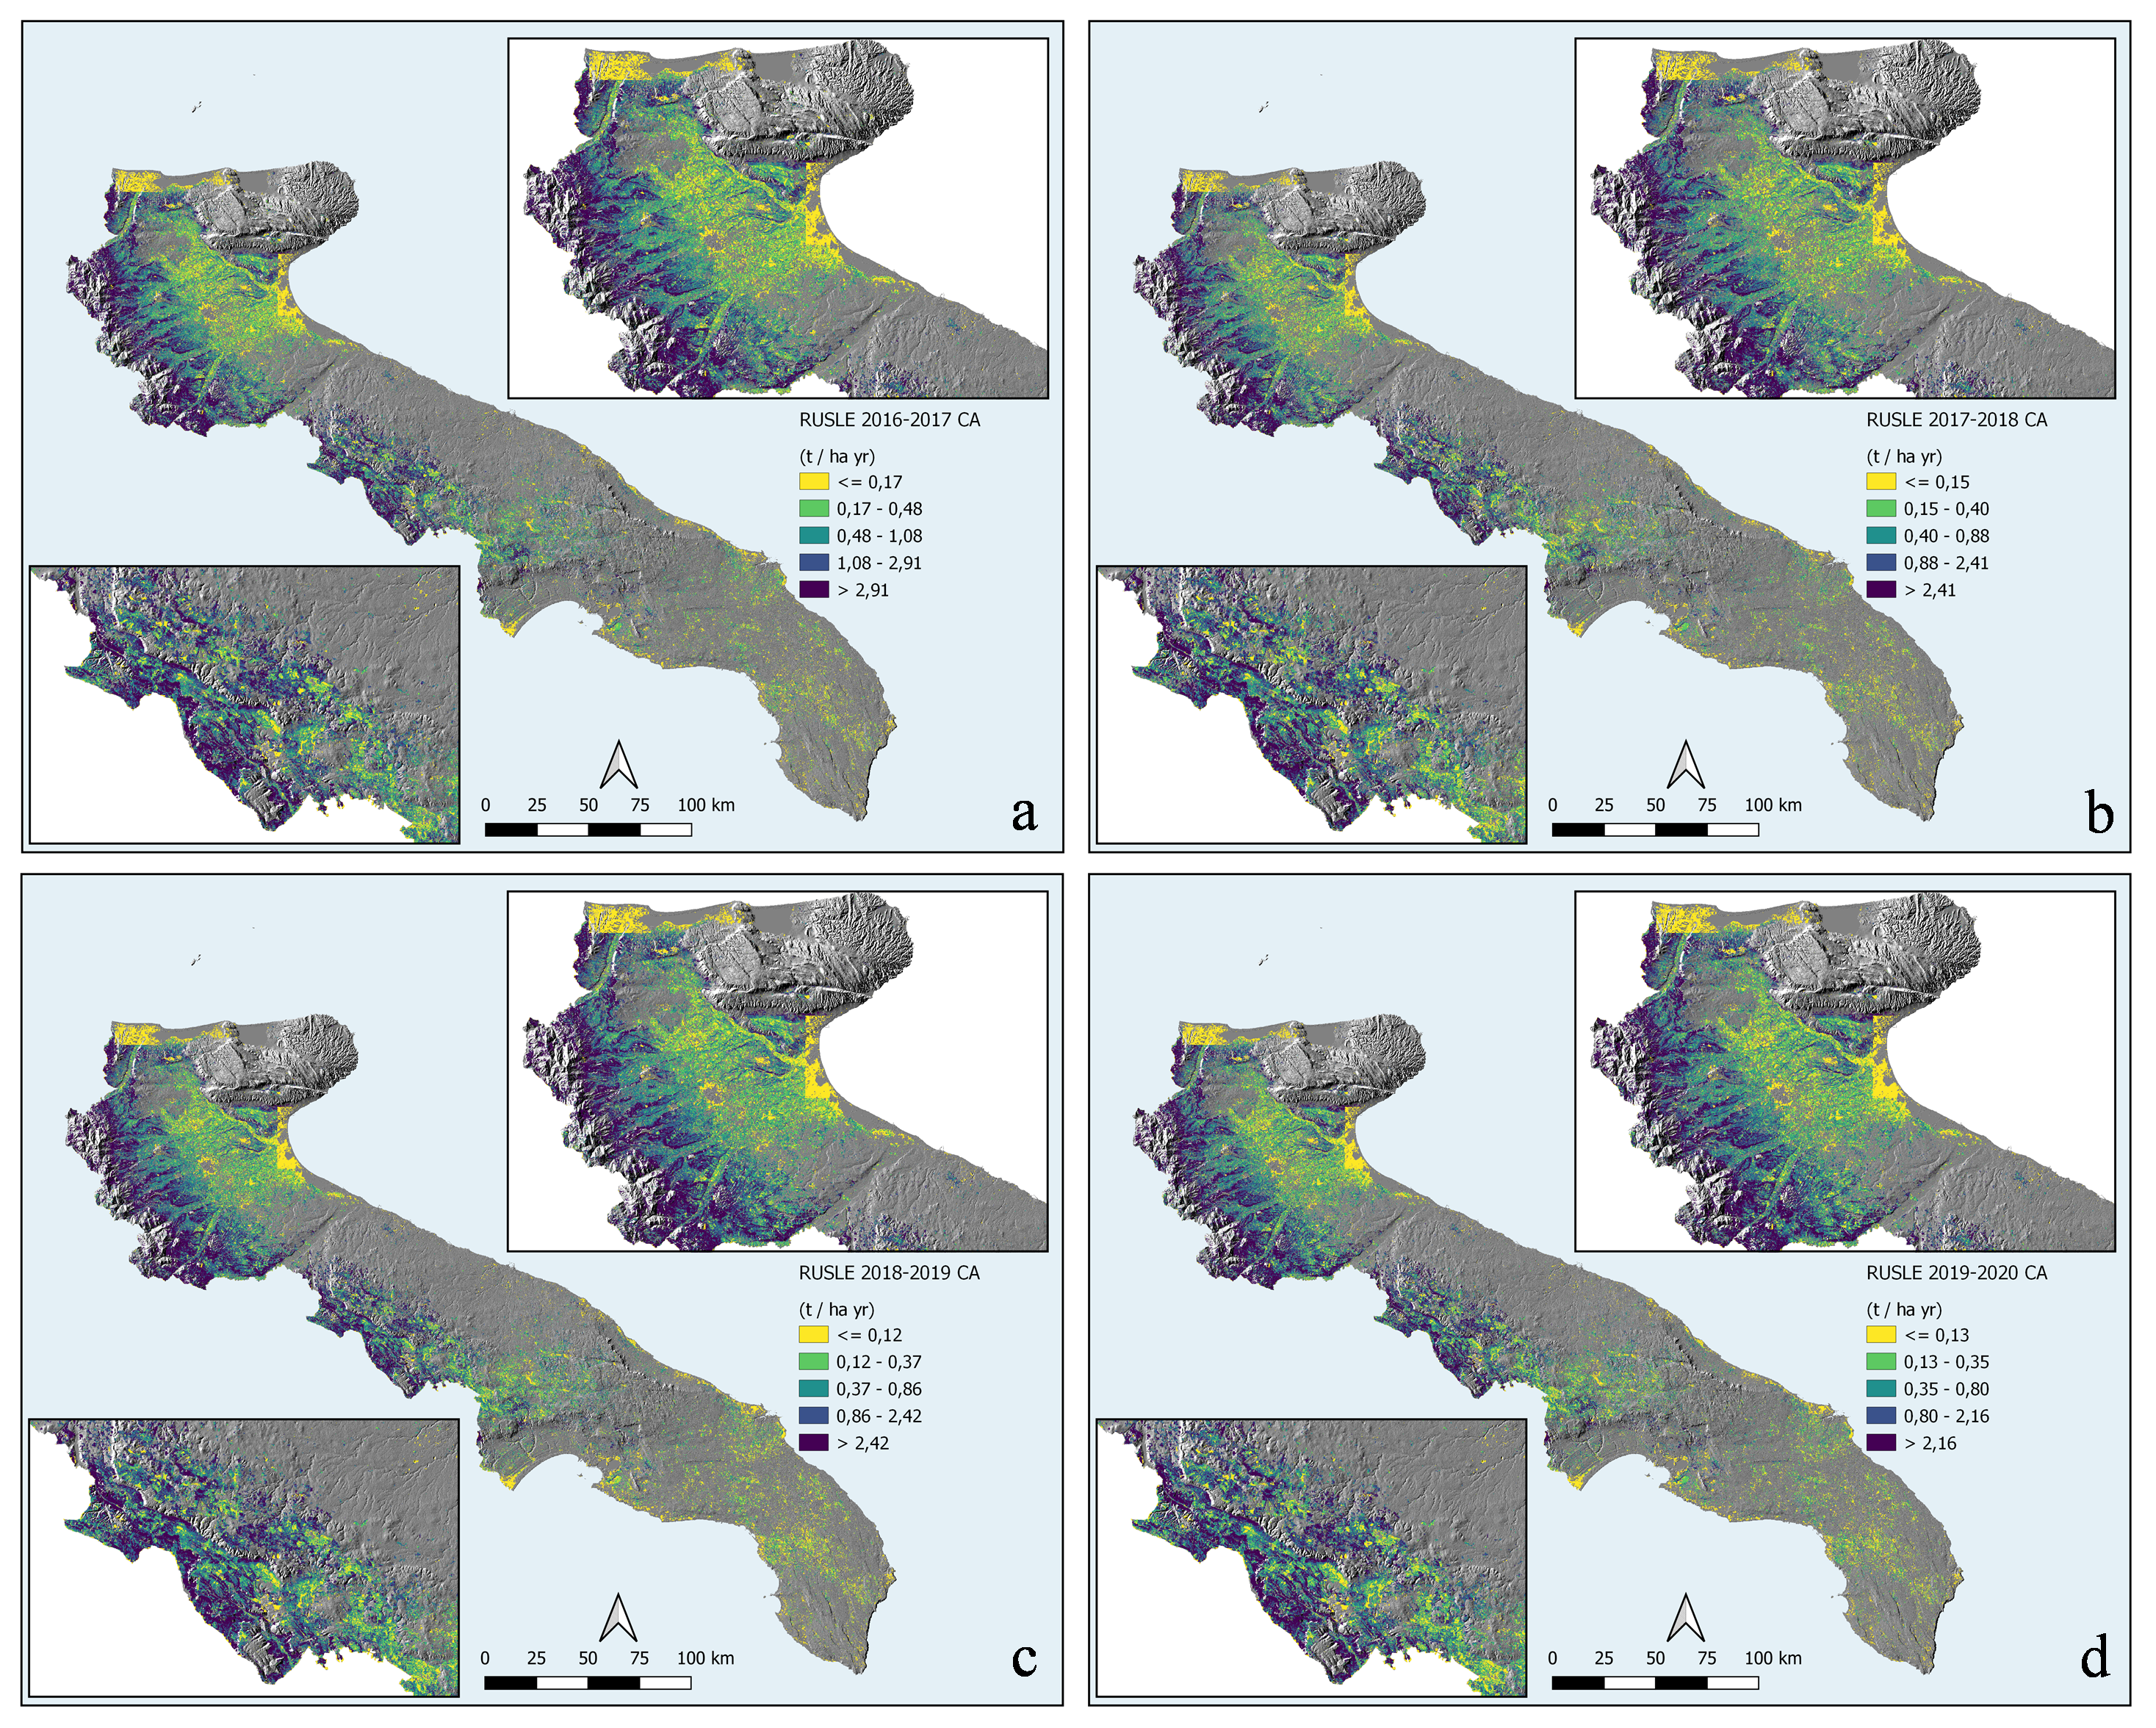

Supplement: s1 [file s1 › Figure S4.bmp]
